# Supplementary material for: Chemical epitaxy of a new orthorhombic phase of Cu2−xS on GaAs
Source: Royal Society of Chemistry journal article supplement (doi:10.1039/c9ce01096c), 2019-01-01
Supplement: c9ce01096c1.pdf [file c9ce01096c1.pdf]

## Electronic Supplementary Information

### Chemical Epitaxy of a New Orthorhombic Phase of $\text{Cu}_{2-x}\text{S}$ on GaAs

Ofir Friedman<sup>a,b</sup>, Dor Braun<sup>a</sup>, Nitzan Maman<sup>b</sup>, Vladimir Ezersky<sup>b</sup> and Yuval Golan<sup>a,b,\*</sup>

<sup>a</sup> Department of Materials Engineering Ben-Gurion University of the Negev, Beer-Sheva 8410501, Israel

<sup>b</sup> Ilse Katz Institute for Nanoscale Science and Technology, Ben-Gurion University of the Negev, Beer-Sheva 8410501, Israel

\*E-mail: ygolan@bgu.ac.il

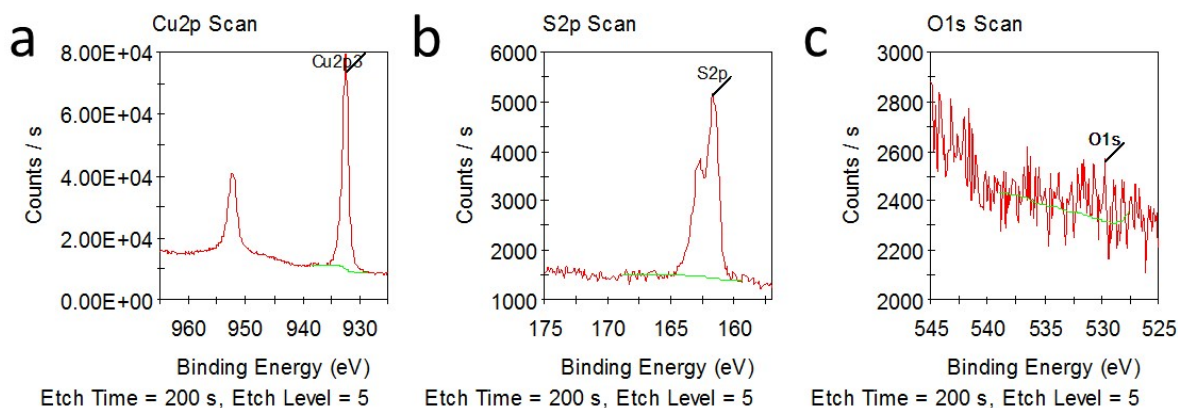

**Fig. S1** High-resolution XPS of etched  $\text{Cu}_{2-x}\text{S}$  thin films deposited on GaAs(100). Cu with 2p3 photoelectron peaks indicate binding energies of 932.5 eV and 952.3 eV (b) S - 2p photoelectron peak show binding energies of 161.7 eV and 162.8 eV. (c) O - 1s photoelectron peak is indistinguishable.

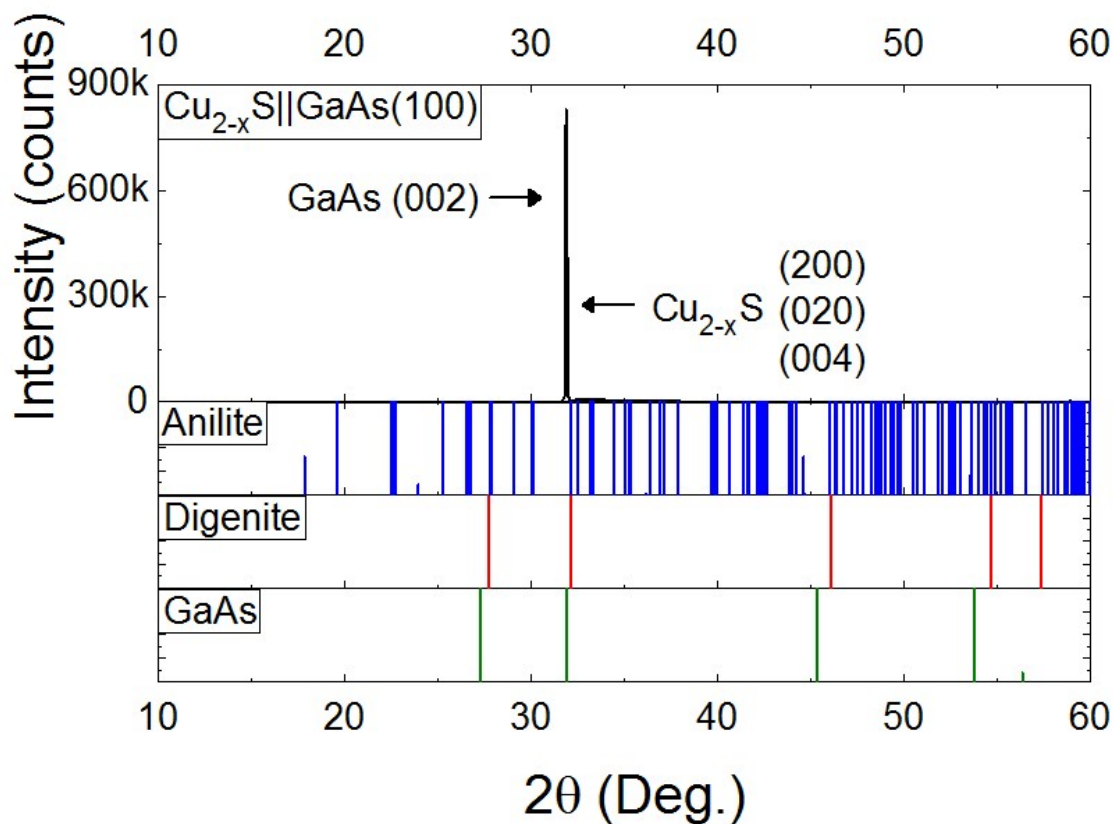

**Fig. S2** Wide 2θ range X-ray diffractogram of Cu<sub>2-x</sub>S thin films deposited on GaAs(100) at temperature of 70 °C for growth duration of 5 hr, Cu<sub>2-x</sub>S – Anilite (1251523, Pearson’s crystal data), Cu<sub>2-x</sub>S - Digenite (455552 , Pearson’s crystal data) and GaAs – zinc blende (453930, Pearson’s crystal data). See Fig.3 in main text for a magnified and resolved view of the region 2θ≈32 degrees.

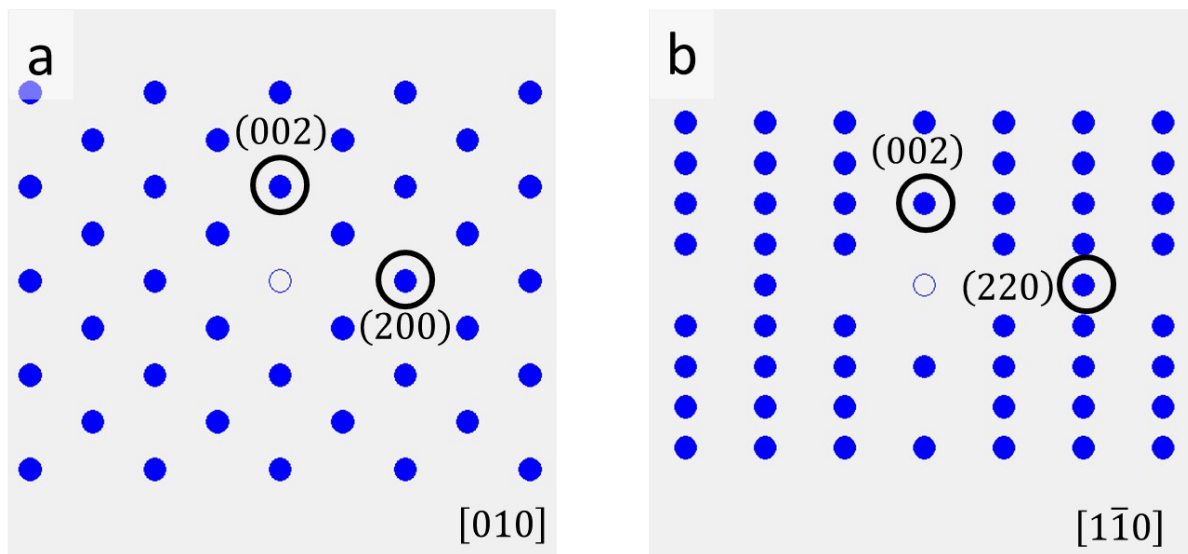

**Fig. S3** Simulated electron diffraction patterns of Anilite phase (1251523, Pearson's crystal data) along zone axes: (a)  $[010]$  and (b)  $[1\bar{1}0]$ .

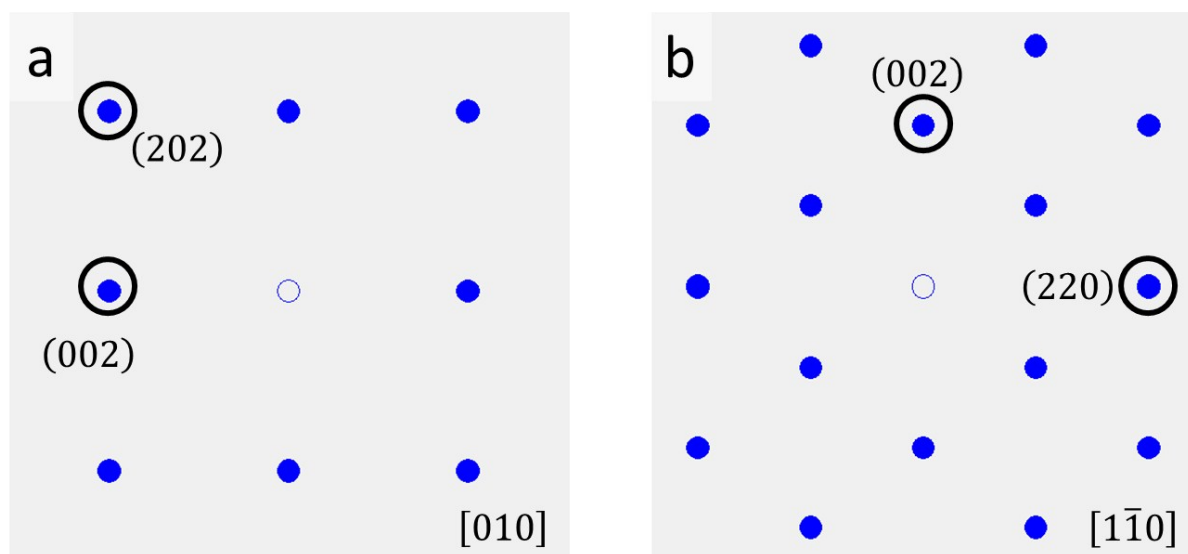

**Fig. S4** Simulated electron diffraction patterns of Digenite phase (455552, Pearson's crystal data) along zone axes: (a)  $[010]$  and (b)  $[1\bar{1}0]$ .

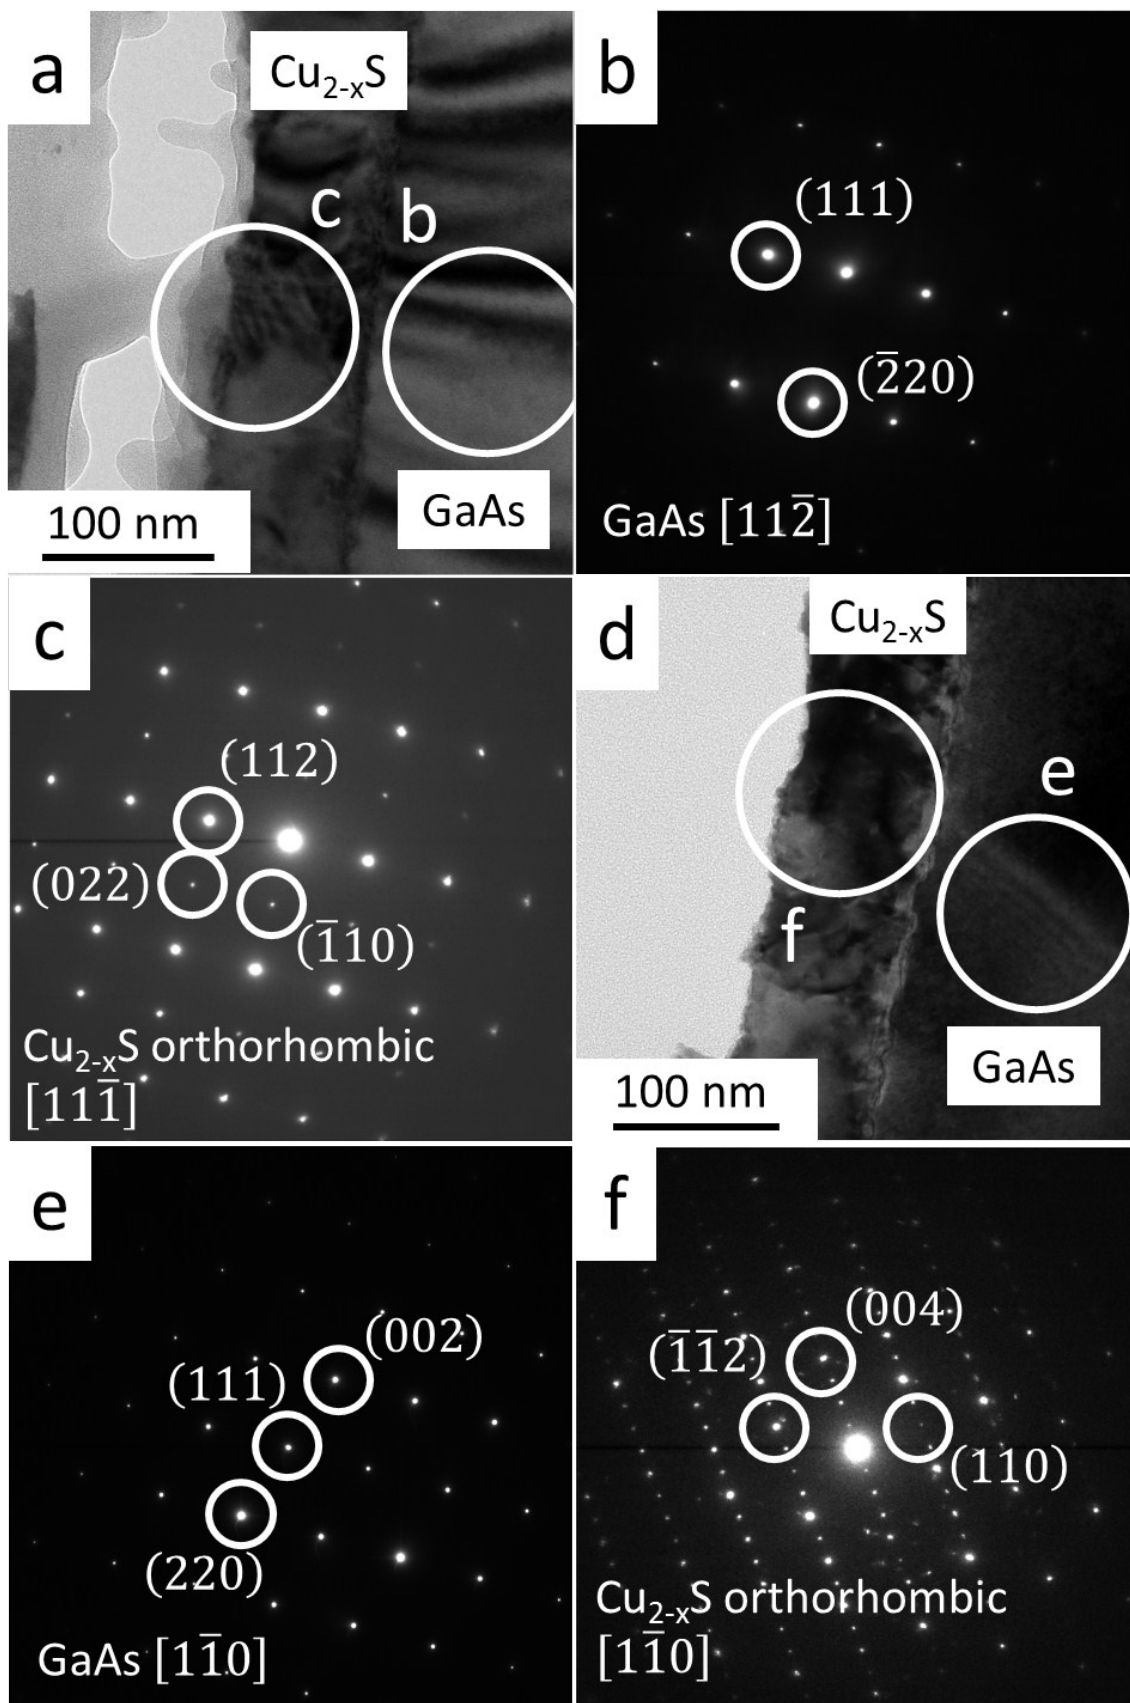

**Fig. S5** (a) Cross-sectional BF-TEM image of  $\text{Cu}_{2-x}\text{S}$  film deposited on GaAs(111)A at deposition temperature of  $70^\circ\text{C}$  for growth duration of 5 hr. (b) SAED pattern taken from the area marked with a white circle in “b”, indicating GaAs  $[11\bar{2}]$  ZA. (c) SAED pattern taken from the area marked with a white circle in “c”, indicating  $\text{Cu}_{2-x}\text{S}$   $[11\bar{1}]$  ZA. (d)  $90^\circ$  rotated cross-sectional BF-TEM micrograph of  $\text{Cu}_{2-x}\text{S}$  film. (e) SAED pattern taken from region marked with “e” in the BF-TEM micrograph, indicating GaAs  $[1\bar{1}0]$  ZA. (f) SAED pattern taken from region marked “f” in the BF-TEM micrograph, indicating BCO phase  $\text{Cu}_{2-x}\text{S}$  film in ZA of  $[1\bar{1}0]$ .

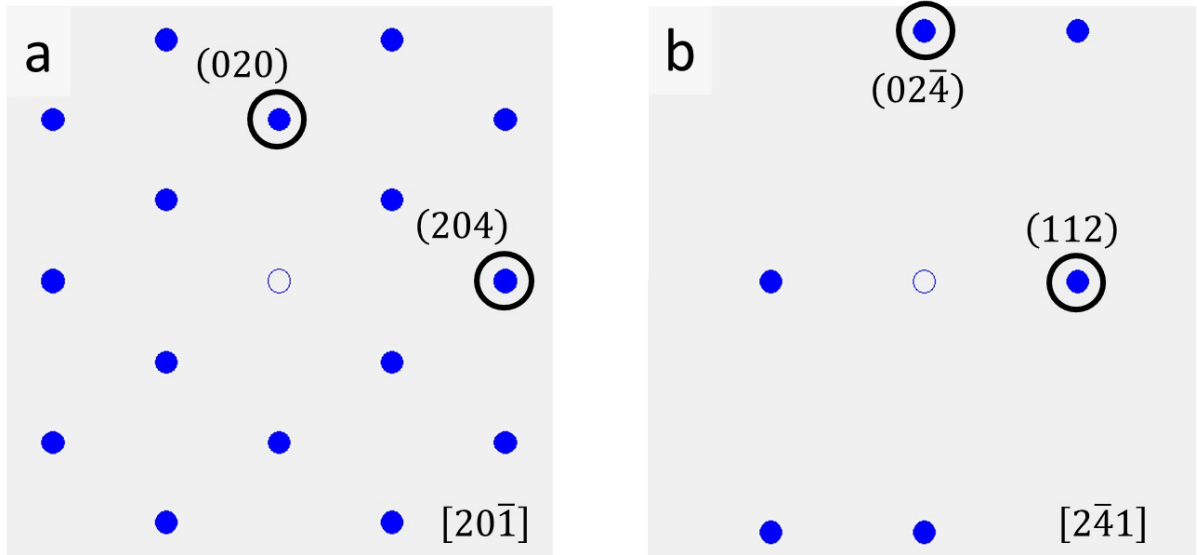

**Fig. S6** Simulated electron diffraction patterns of base-centered orthorhombic (BCO)  $\text{Cu}_{2-x}\text{S}$  phase with lattice parameters  $a \approx b = 5.6 \text{ \AA}$  and  $c = 11.2 \text{ \AA}$  viewed along zone axes  $[20\bar{1}]$  and  $[2\bar{4}1]$ .
